# Supplementary material for: A nitrocellulose membrane-based integrated microfluidic system for bacterial detection utilizing magnetic-composite membrane microdevices and bacteria-specific aptamers
Source: Royal Society of Chemistry journal article supplement (doi:10.1039/c8lc00251g), 2018-01-01
Supplement: c8lc00251g1.pdf [file c8lc00251g1.pdf]

## Lab on a Chip

### Supplementary Information

#### A Nitrocellulose membrane-based Integrated Microfluidic System for Bacterial Detection Utilizing Magnetic-composite-membrane Microdevices and Bacteria-specific Aptamers†

Jia-Han Wu<sup>a</sup>, Chih-Hung Wang<sup>a</sup>, Yu-Dong Ma<sup>a</sup>, and Gwo-Bin Lee<sup>a, b, c\*</sup>

<sup>a</sup>Department of Power Mechanical Engineering, National Tsing Hua University, Hsinchu, Taiwan 30013

<sup>b</sup>Institute of Biomedical Engineering, National Tsing Hua University, Hsinchu, Taiwan 30013

<sup>c</sup>Institute of NanoEngineering and Microsystems, National Tsing Hua University, Hsinchu, Taiwan 30013

\*Corresponding author: Gwo-Bin Lee, E-mail: gwobin@pme.nthu.edu.tw; Fax: +886-3-5742495; Tel: +886-3-5715131 Ext. 33765

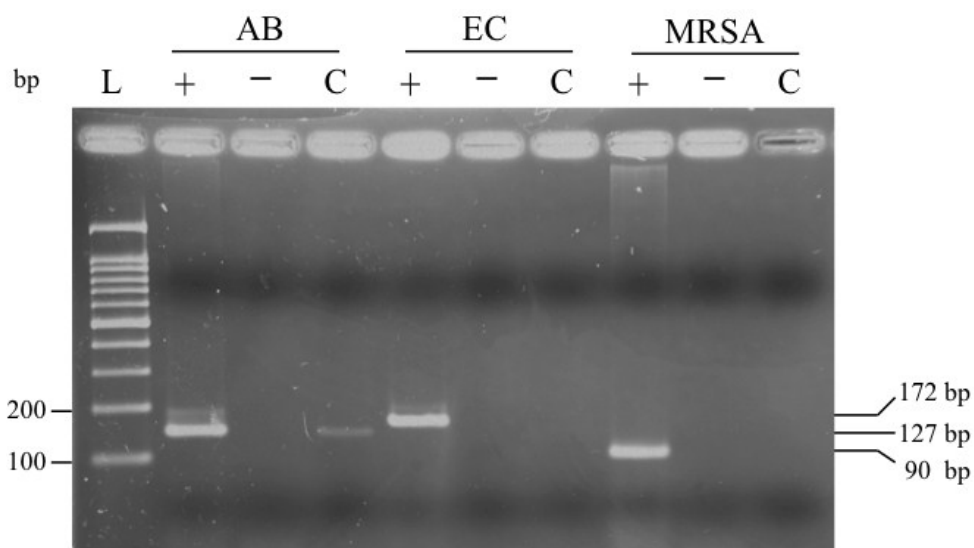

**Supplement Figure 1.** The specificity tests of the AB-specific aptamer against AB, EC, and MRSA. Lane - = NC, Lane "+" = positive control (genomic DNA extracted from the tested bacteria), and Lane C = specific aptamer-coated beads incubated with the target bacteria: AB, EC, and MRSA and amplified by using target specific primer to generate 127, 172 and 90 bp of PCR products, respectively. *Acinetobacter*

*baumannii* (AB), *Escherichia coli* (EC), and multidrug-resistant *Staphylococcus aureus* (MRSA) were tested.
